# Supplementary material for: Regioisomeric AIE-active luminogens with a substituent aldehyde group for controllable and reversible photochromic behavior and sensitive fluorescence detection of hydrogen sulfite
Source: Royal Society of Chemistry journal article supplement (doi:10.1039/d0tc05994c), 2021-01-01
Supplement: d0tc05994c1.pdf [file d0tc05994c1.pdf]

Electronic Supplementary Material (ESI) for Journal of Materials Chemistry C. This journal is ©  
The Royal Society of Chemistry 2020

## Supporting Information

### **Regioisomeric AIE-active luminogens with substituent aldehyde group for controllable and reversible photochromic behavior and sensitive fluorescent detection of hydrogen sulphite**

Hai-Xia Yu, Junge Zhi,\* and Jin-Liang Wang\*

Key Laboratory of Cluster Science of Ministry of Education, Beijing Key Laboratory of Photoelectronic/Electrophotonic Conversion Materials, School of Chemistry and Chemical Engineering, Beijing Institute of Technology, Beijing, 100081, China.

E-mail: [jungezhi@bit.edu.cn](mailto:jungezhi@bit.edu.cn); [jinliwang@bit.edu.cn](mailto:jinliwang@bit.edu.cn)

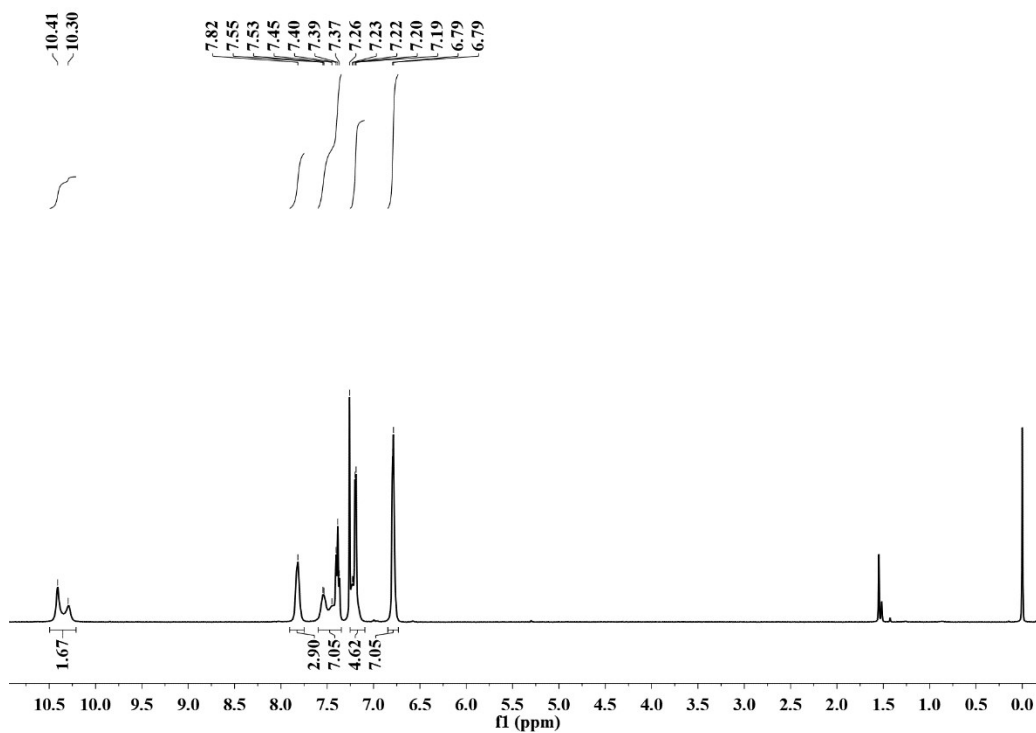

**Figure S1.**  $^1\text{H}$  NMR spectrum (in  $\text{CDCl}_3$ ) of DPDT-o-CHO.

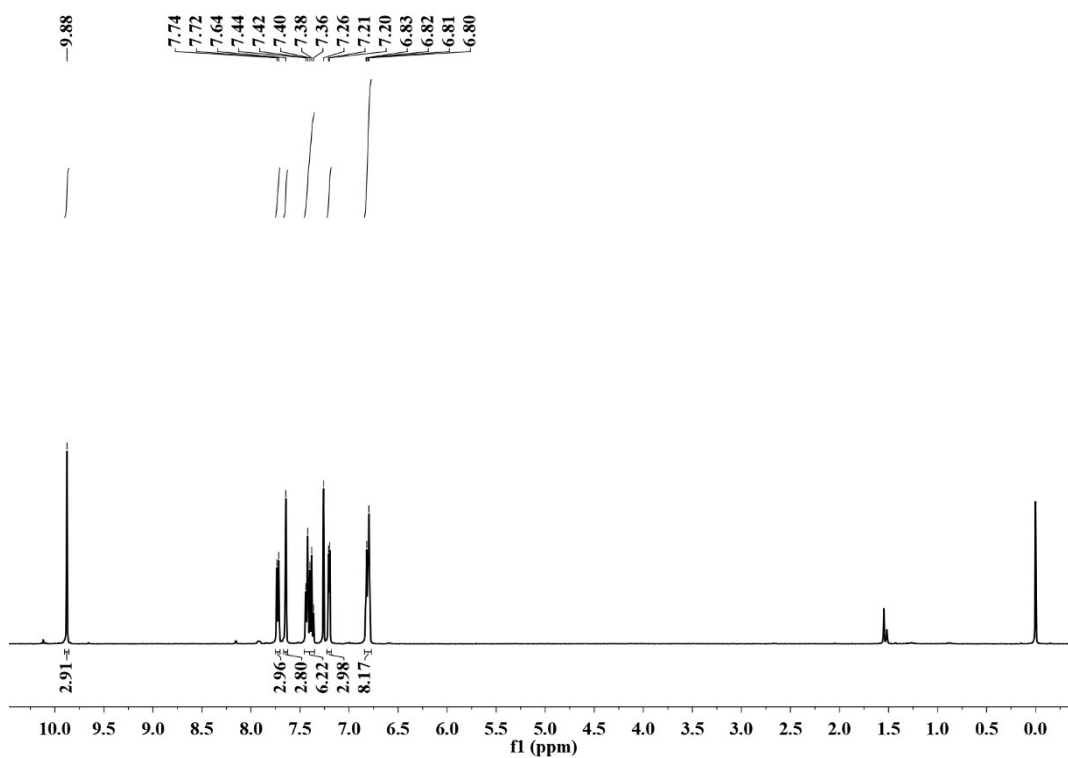

**Figure S2.**  $^1\text{H}$  NMR spectrum (in  $\text{CDCl}_3$ ) of DPDT-m-CHO.

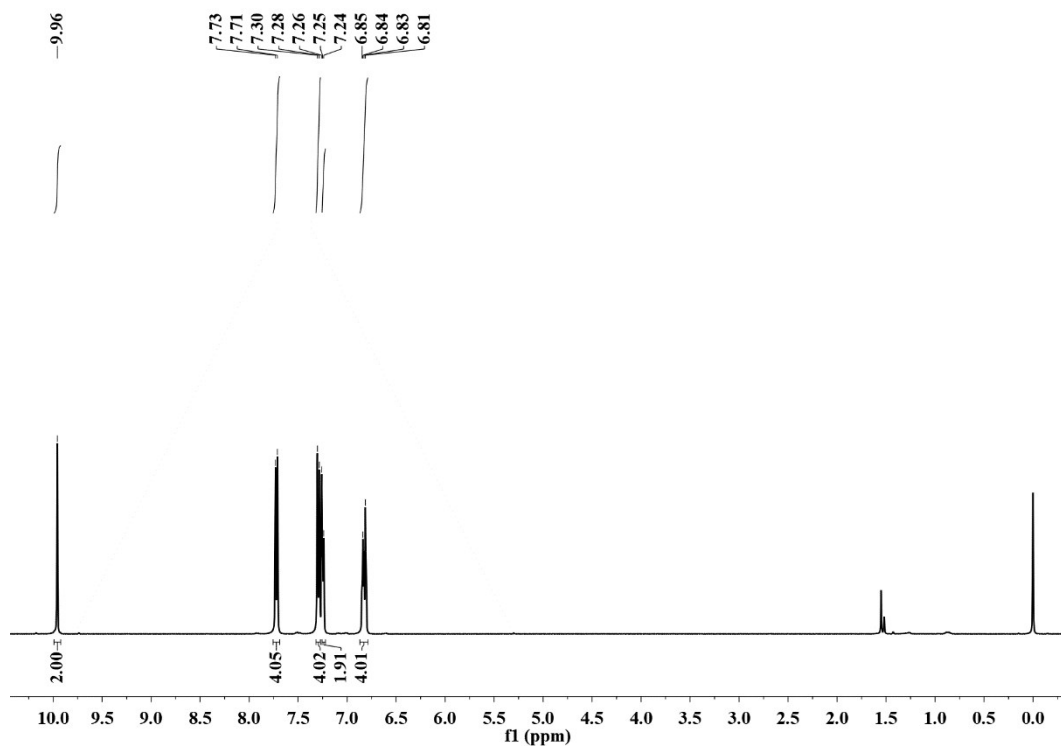

Figure S3.  $^1\text{H}$  NMR spectrum (in  $\text{CDCl}_3$ ) of DPDT-p-CHO.

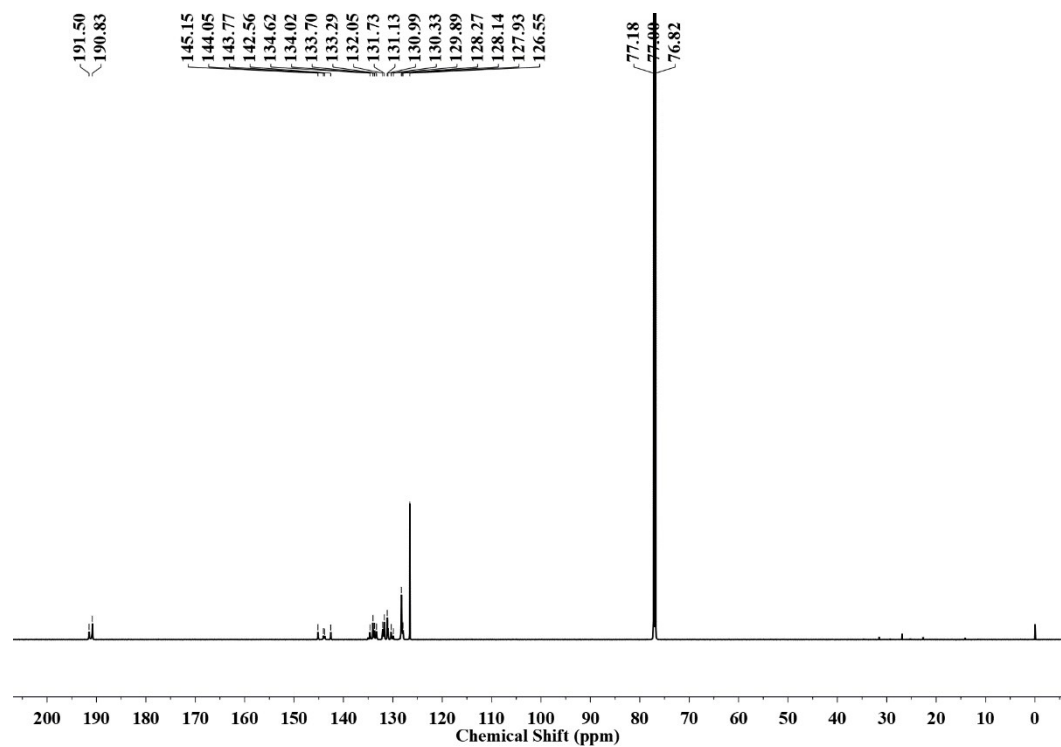

Figure S4.  $^{13}\text{C}$  NMR spectrum (in  $\text{CDCl}_3$ ) of DPDT-o-CHO.

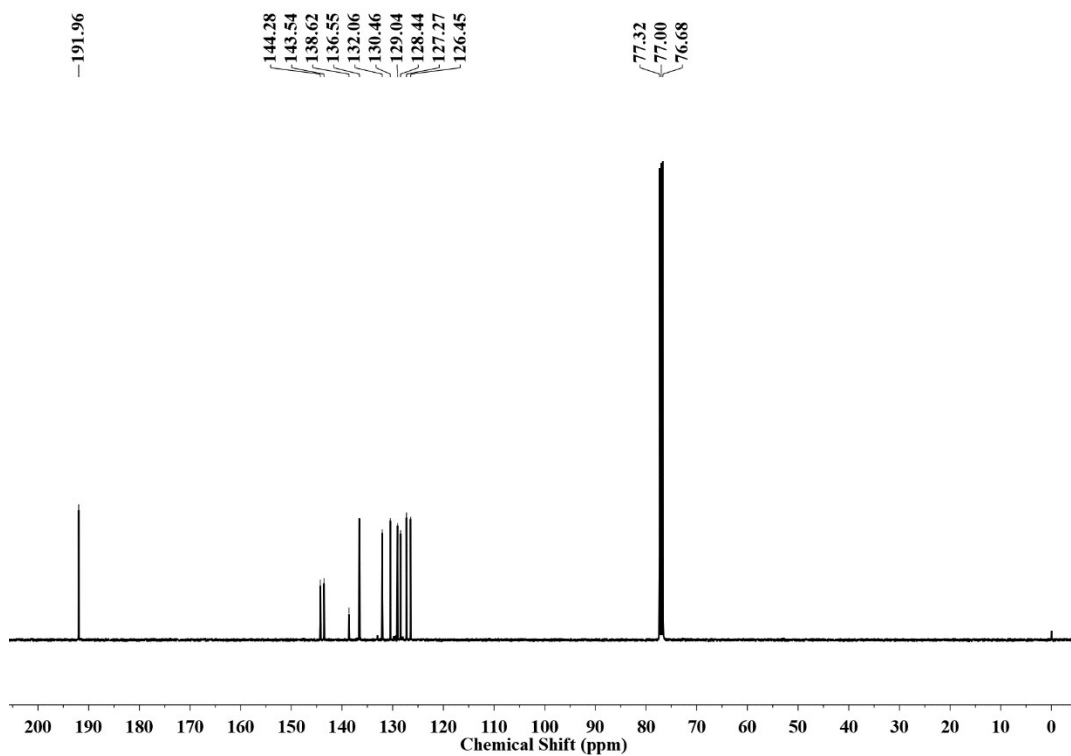

Figure S5.  $^{13}\text{C}$  NMR spectrum (in  $\text{CDCl}_3$ ) of DPDT-m-CHO.

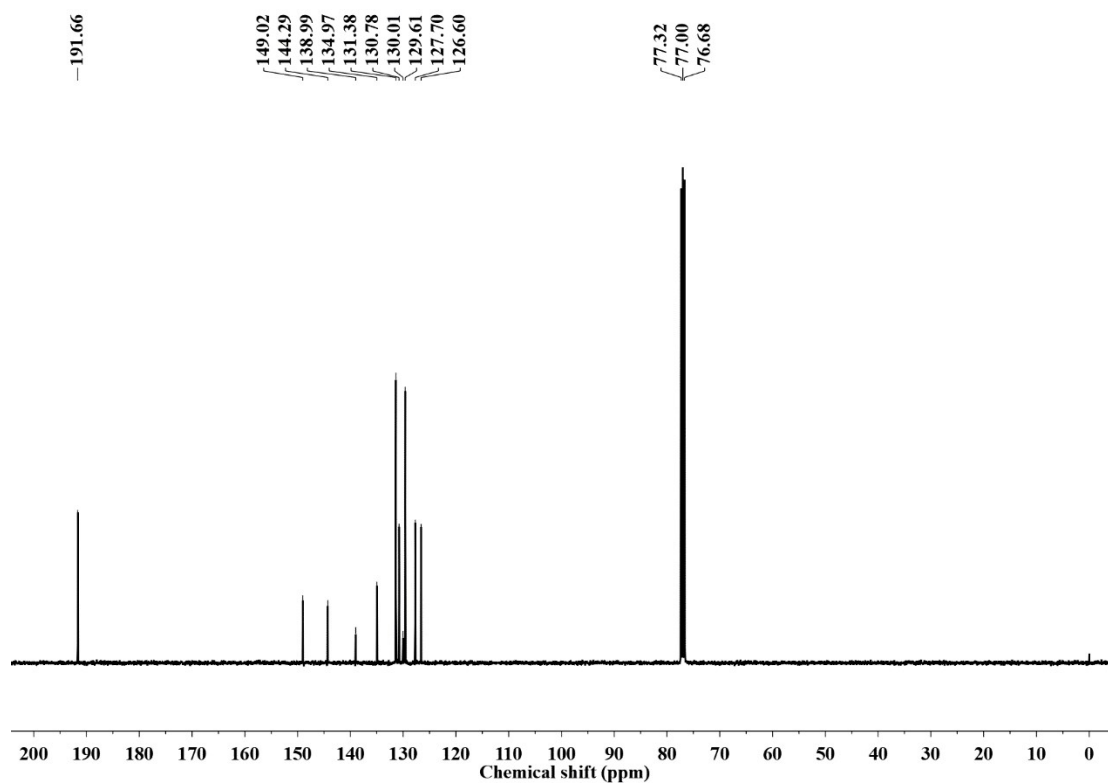

Figure S6.  $^{13}\text{C}$  NMR spectrum (in  $\text{CDCl}_3$ ) of DPDT-p-CHO.

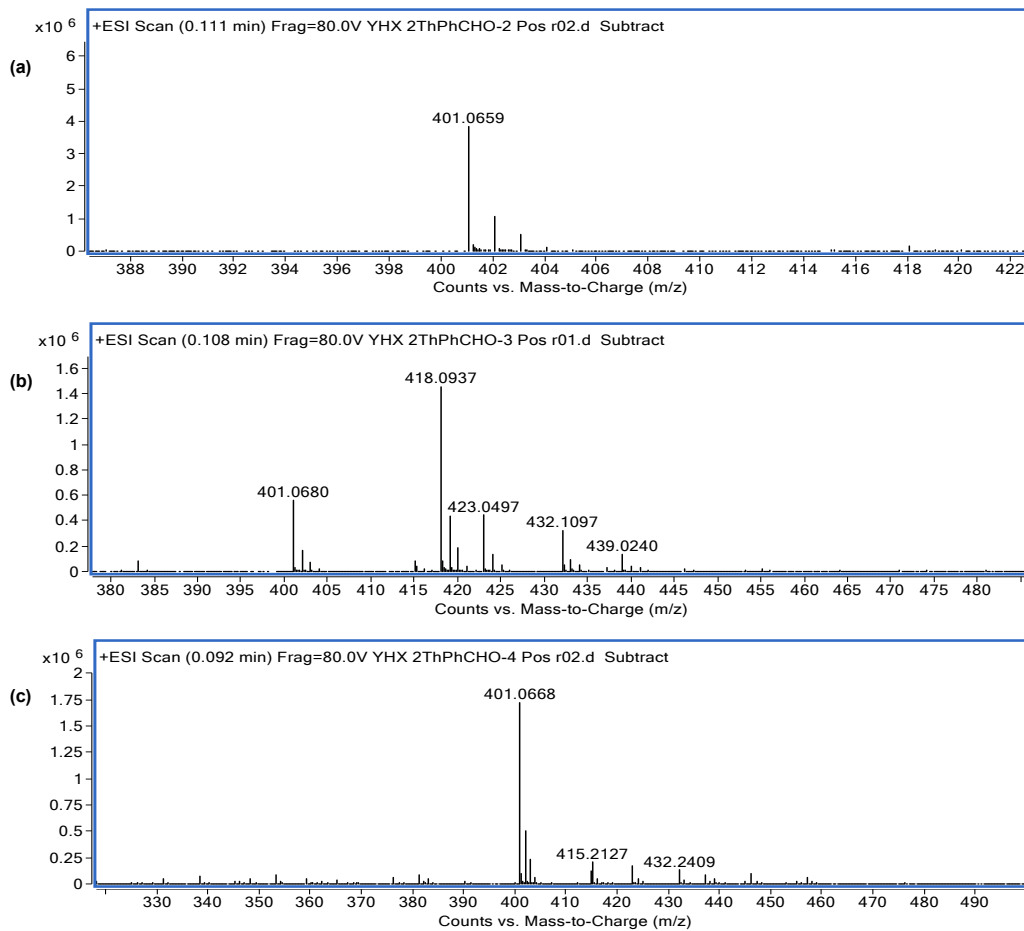

Figure S7. ESI-Mass spectra of (a) DPDT-o-CHO, (b) DPDT-m-CHO and (c) DPDT-p-CHO.

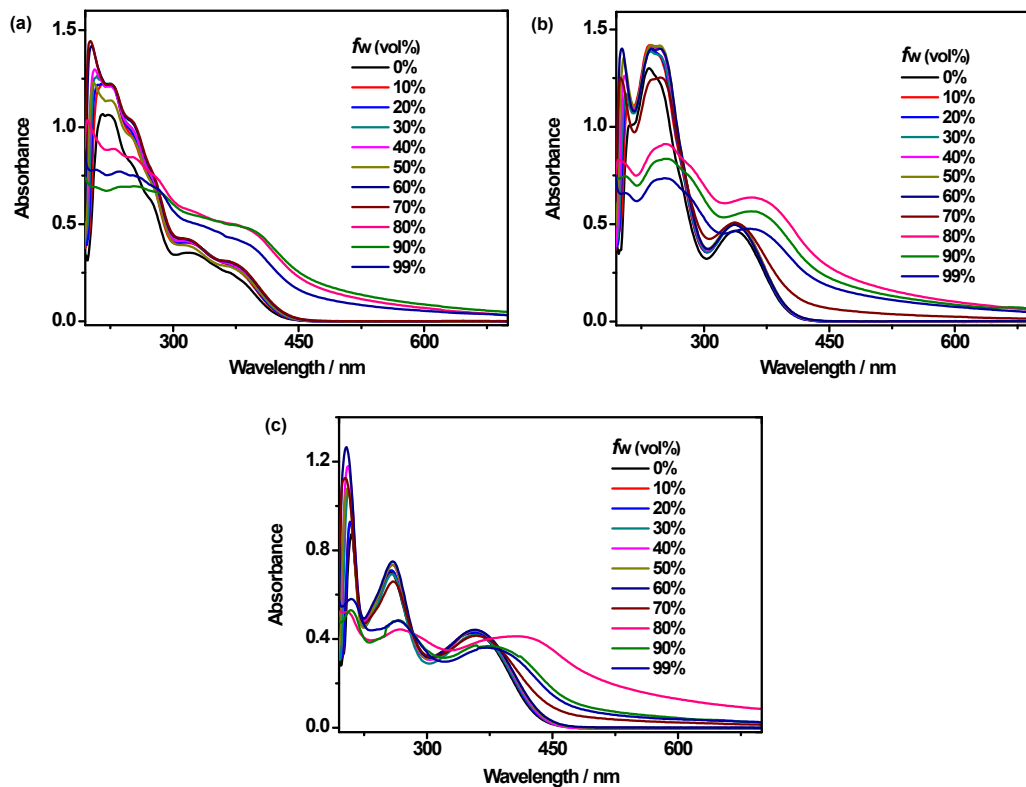

**Figure S8.** Absorption spectra of (a) **DPDT-o-CHO**, (b) **DPDT-m-CHO** and (c) **DPDT-p-CHO** in  $\text{CH}_3\text{OH-H}_2\text{O}$  mixtures with different water contents ( $f_w$ ).

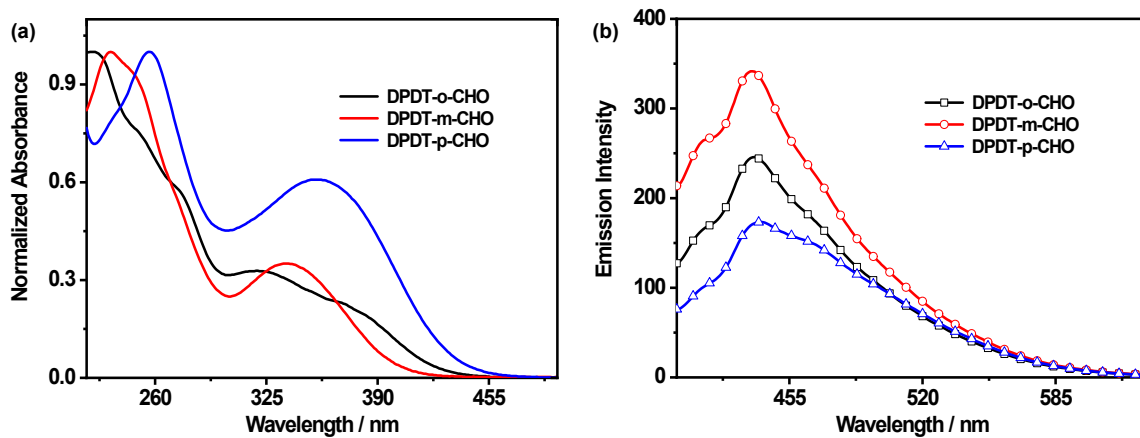

**Figure S9.** Normalized UV-vis absorption spectra (a) and fluorescence spectra (b) of **DPDT-o-CHO**, **DPDT-m-CHO** and **DPDT-p-CHO** in  $\text{CH}_3\text{OH}$ .

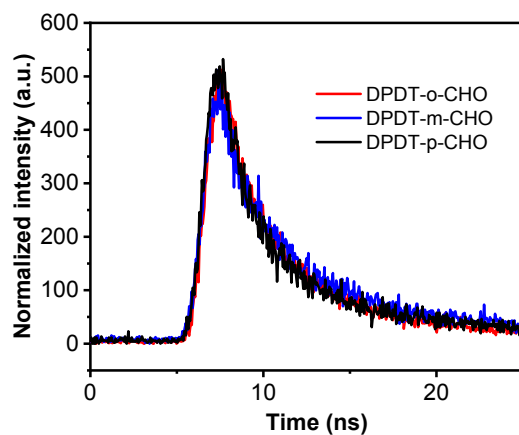

**Figure S10.** Fluorescence decay spectra of **DPDT-o-CHO**, **DPDT-m-CHO** and **DPDT-p-CHO** in  $\text{CH}_3\text{OH}$ .

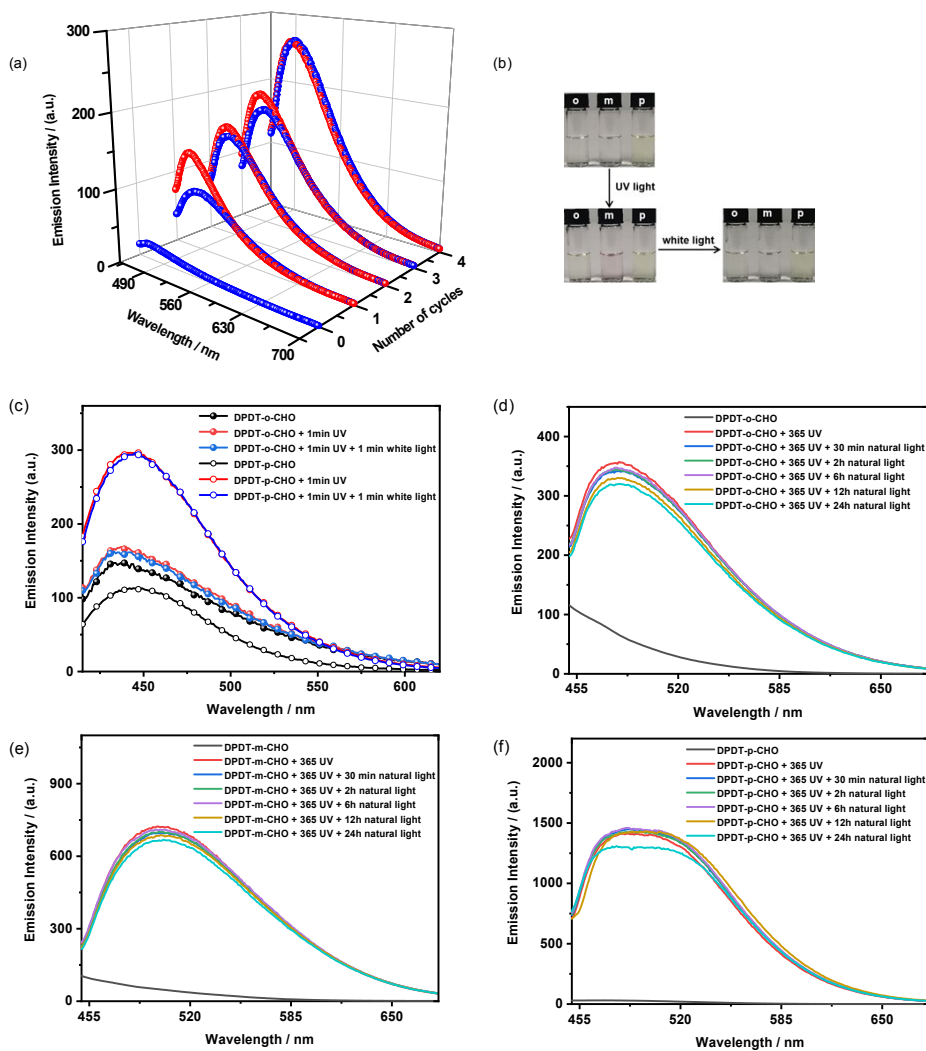

Figure S11. (a) Fluorescence spectra of **DPDT-m-CHO** in CH<sub>3</sub>OH in the cycle of 1 min UV irradiation (red line) and 1 min white light (blue line), (b) the photographs of **DPDT-o-CHO** (o), **DPDT-m-CHO** (m) and **DPDT-p-CHO** (p) after the illumination of UV irradiation and white light, (c) **DPDT-o-CHO** and **DPDT-p-CHO** under the UV irradiation (1 min) and white light (1 min), and the fluorescence spectra under the natural light illumination of (d) **DPDT-o-CHO**, (e) **DPDT-m-CHO** and (f) **DPDT-p-CHO** in CH<sub>3</sub>OH after 2 h UV-light irradiation.

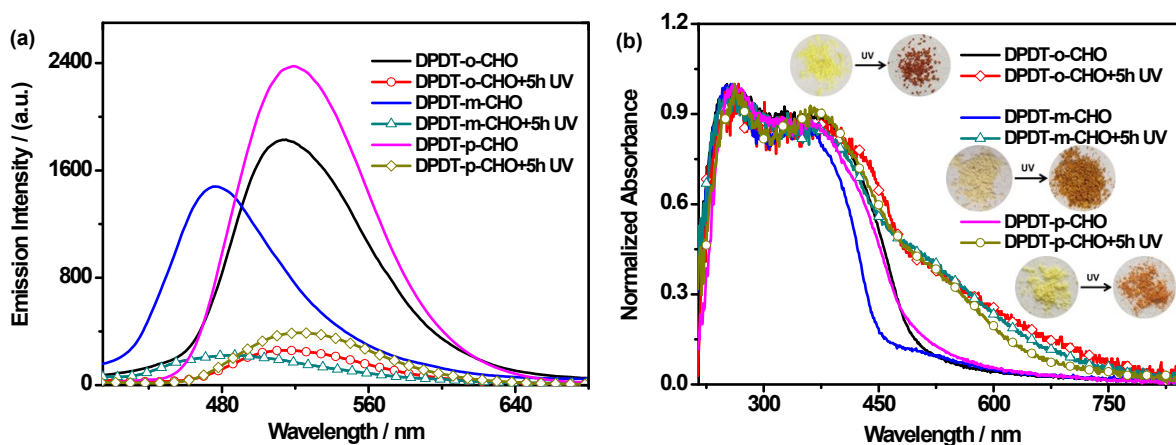

Figure S12. Fluorescence spectra (a) and Normalized absorption spectra (b) of **DPDT-o-CHO**,

**DPDT-m-CHO** and **DPDT-p-CHO** in solid state before and after UV irradiation for 5 h (The insets show color switch photographs in natural light).

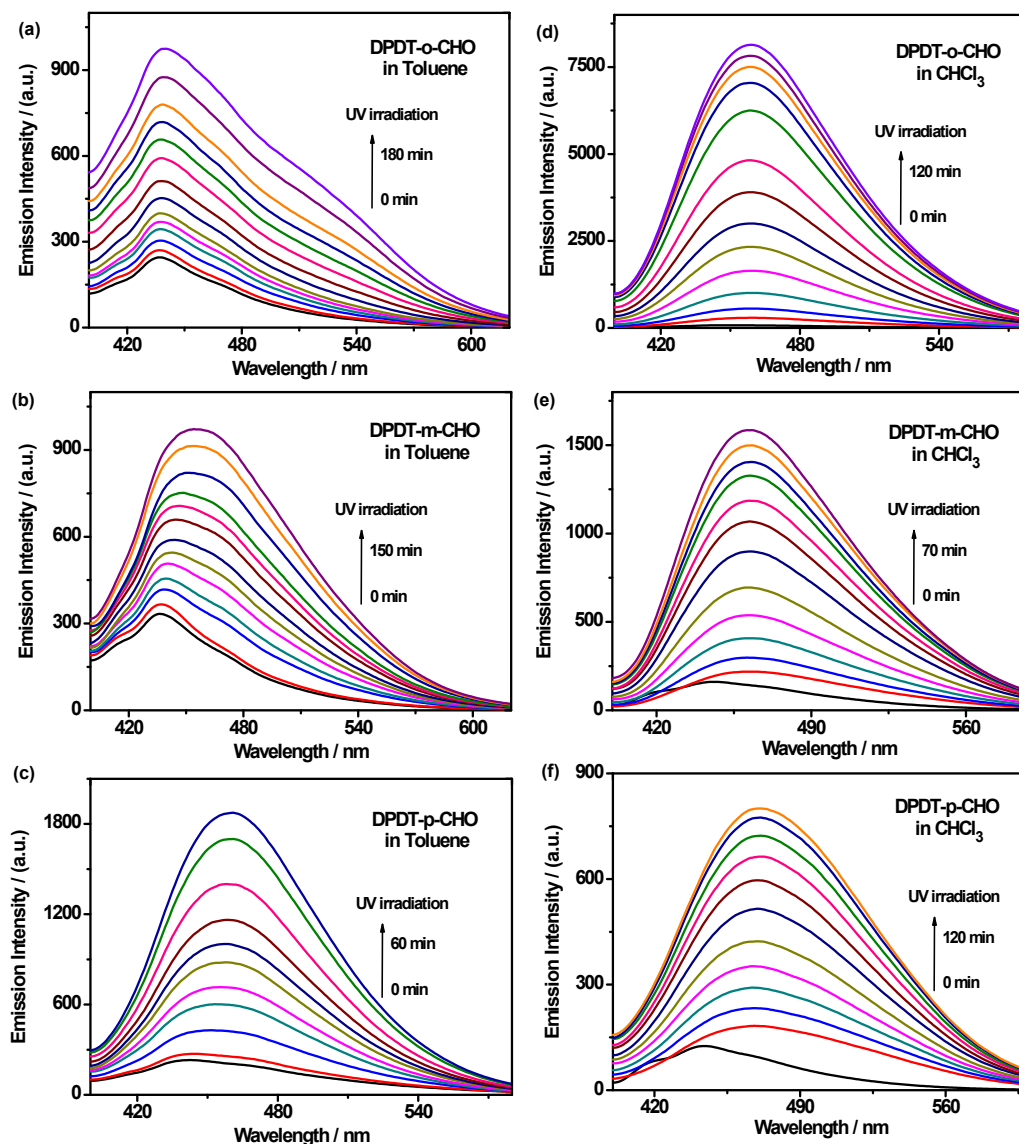

**Figure S13.** Fluorescence spectra of (a,d) **DPDT-o-CHO**, (b,e) **DPDT-m-CHO** and (c,f) **DPDT-p-CHO** in toluene and CHCl<sub>3</sub> upon 365 nm UV irradiation, respectively.



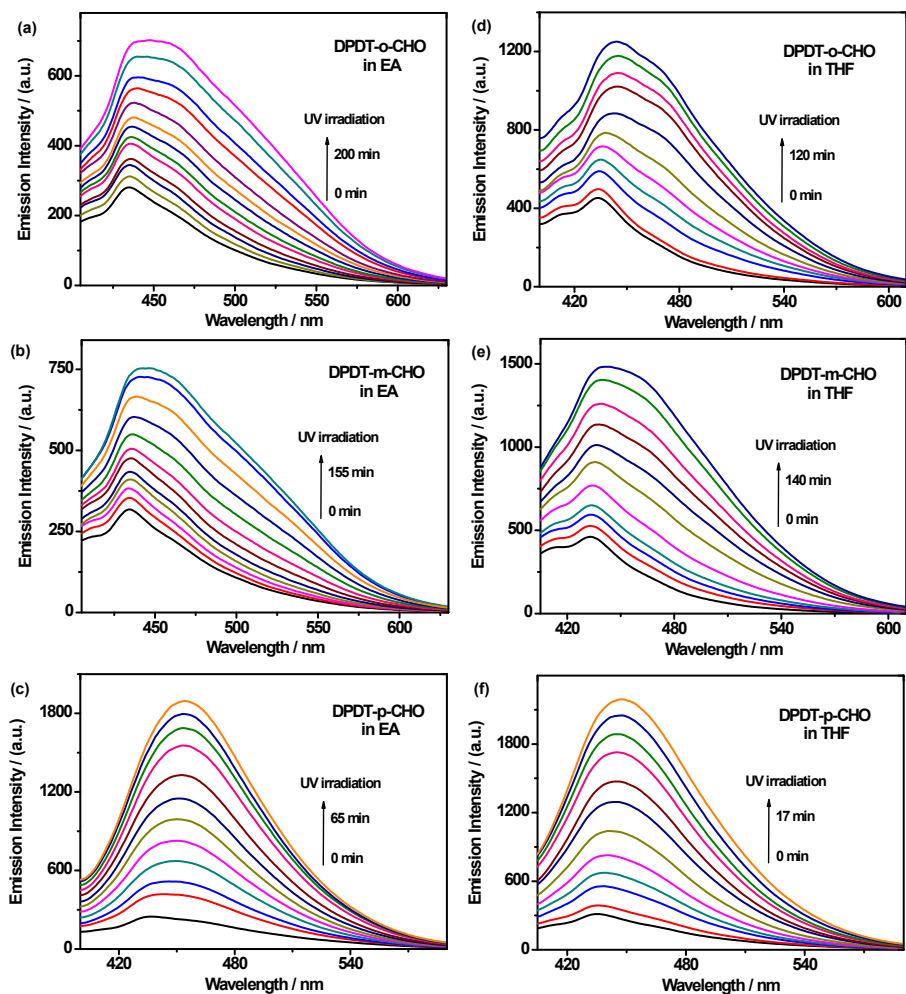

**Figure S14.** Fluorescence spectra of (a,d) DPDT-o-CHO, (b,e) DPDT-m-CHO and (c,f) DPDT-p-CHO in EA and THF solution upon 365 nm irradiation respectively.

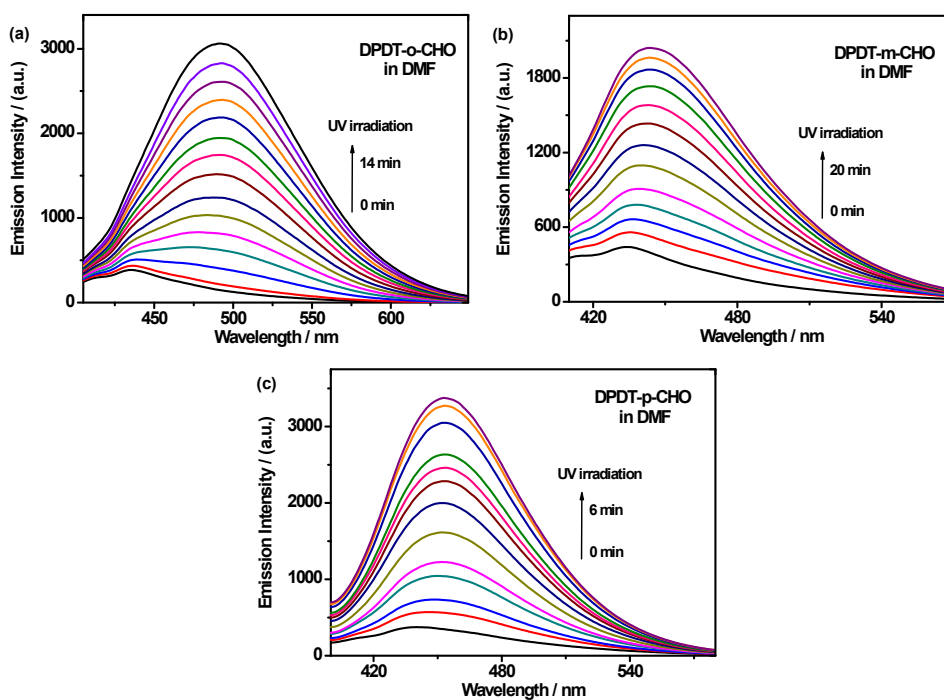

**Figure S15.** Fluorescence spectra of (a) **DPDT-o-CHO**, (b) **DPDT-m-CHO** and (c) **DPDT-p-CHO** in DMF upon 365 nm irradiation respectively.

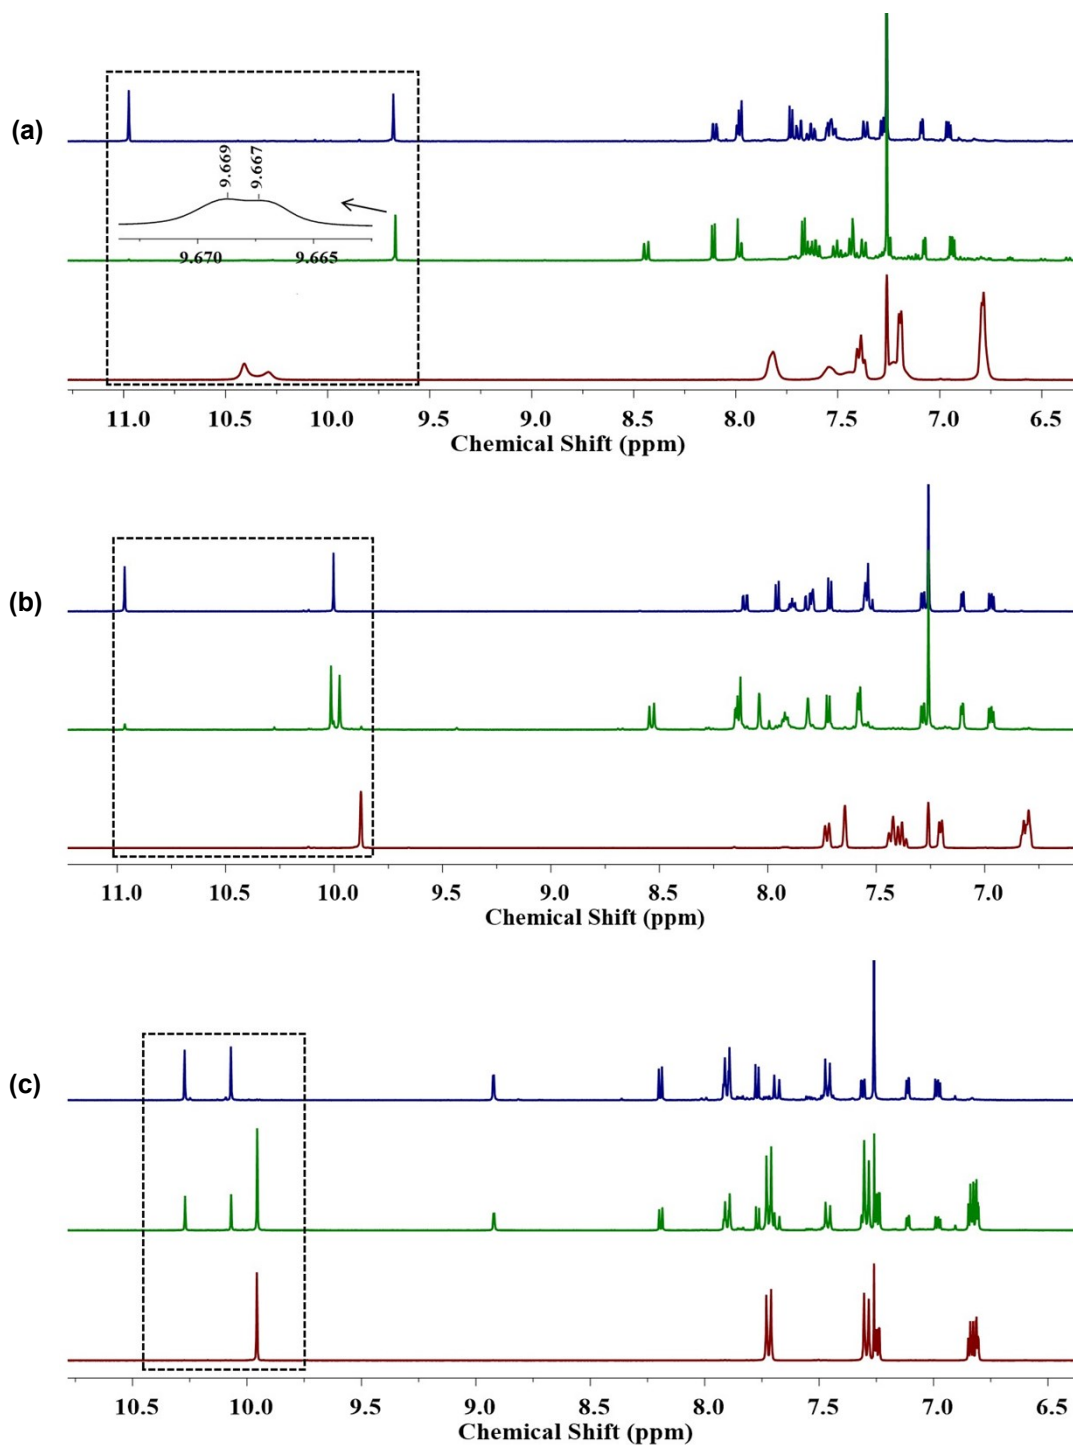

**Figure S16.**  $^1\text{H}$  NMR spectra (in  $\text{CDCl}_3$ ) of the pristine (red line), upon UV irradiation (green line) and the Katz-modified Mallory photocyclization reaction products (blue line) of (a) **DPDT-o-CHO**, (b) **DPDT-m-CHO**, (c) **DPDT-p-CHO** (The block diagrams focus on the chemical shift of proton signals of -CHO).

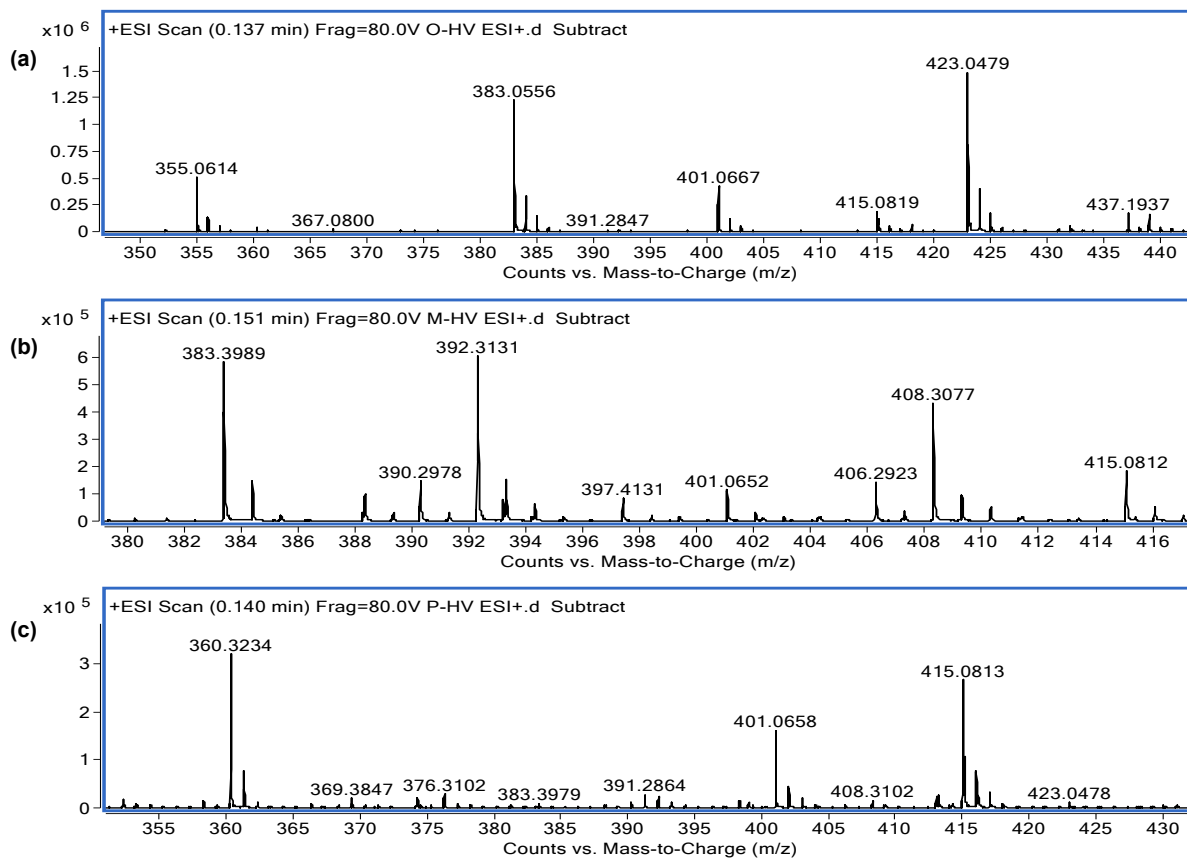

**Figure S17.** Mass spectra of (a) **DPDT-o-CHO**, (b) **DPDT-m-CHO** and (c) **DPDT-p-CHO** irradiated with UV light in CH<sub>3</sub>OH solution.

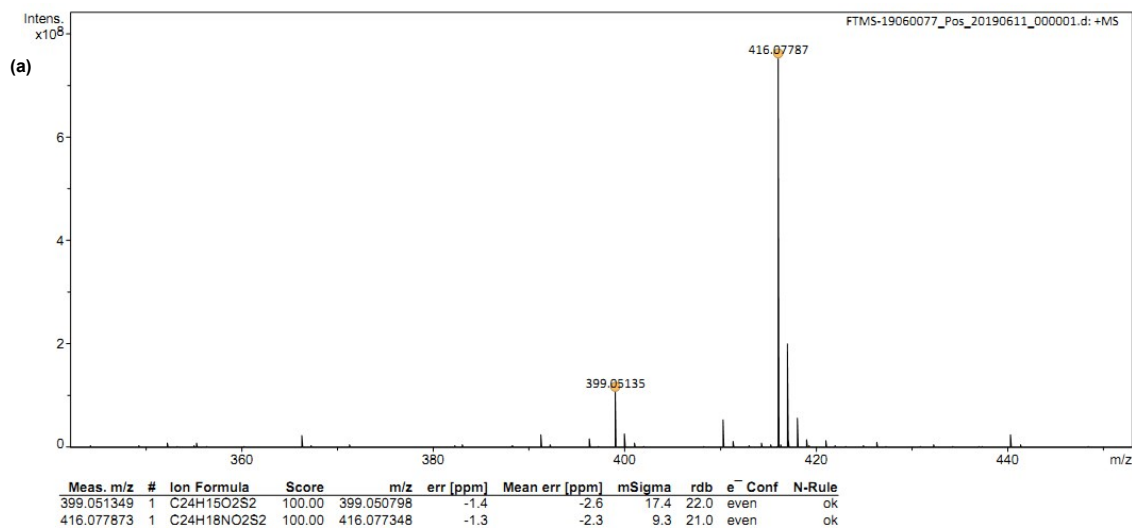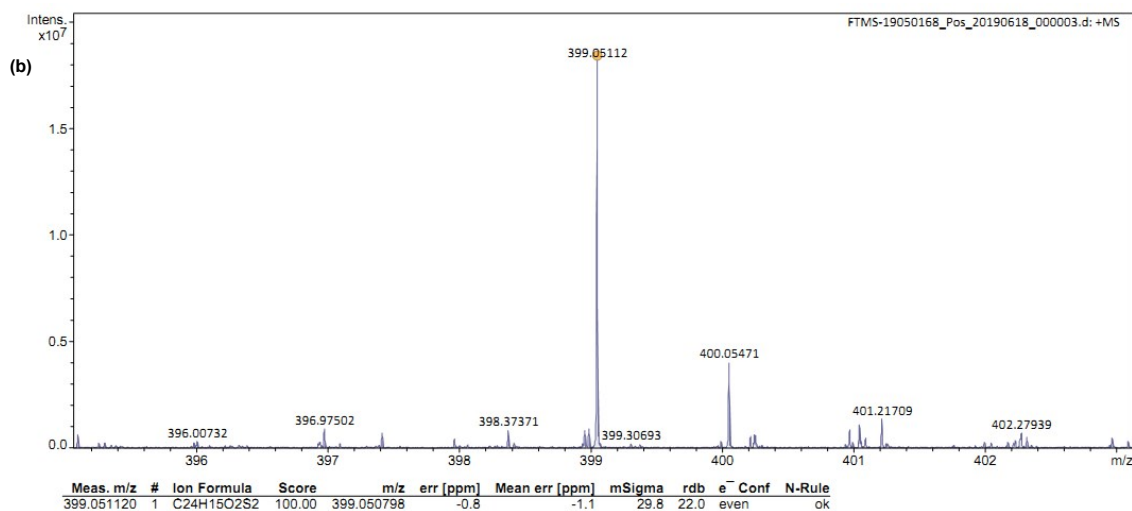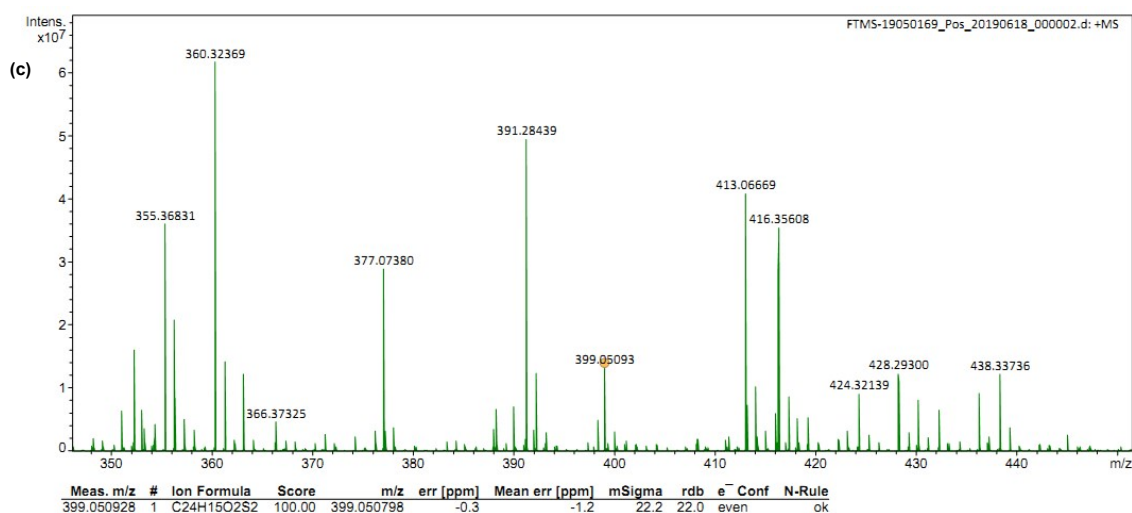

**Figure S18.** Mass spectra of the Katz-modified Mallory photocyclization reaction products (a) DPDT-o-CHO (c), (b) DPDT-m-CHO (c) and (c) DPDT-p-CHO (c).

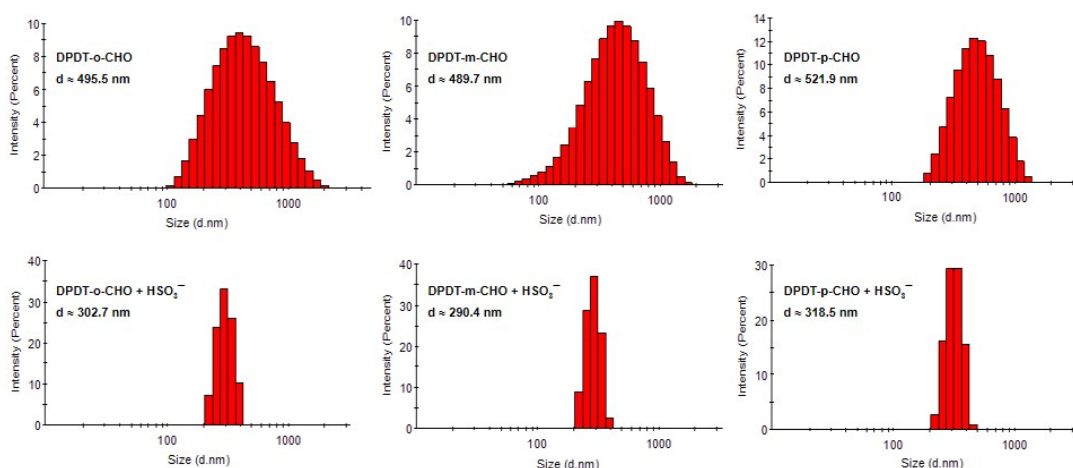

**Figure S19.** Particle size distributions of the three isomers before and after the addition of  $\text{HSO}_3^-$  in  $\text{CH}_3\text{OH-H}_2\text{O}$  mixture ( $f_w=90\%$ ).

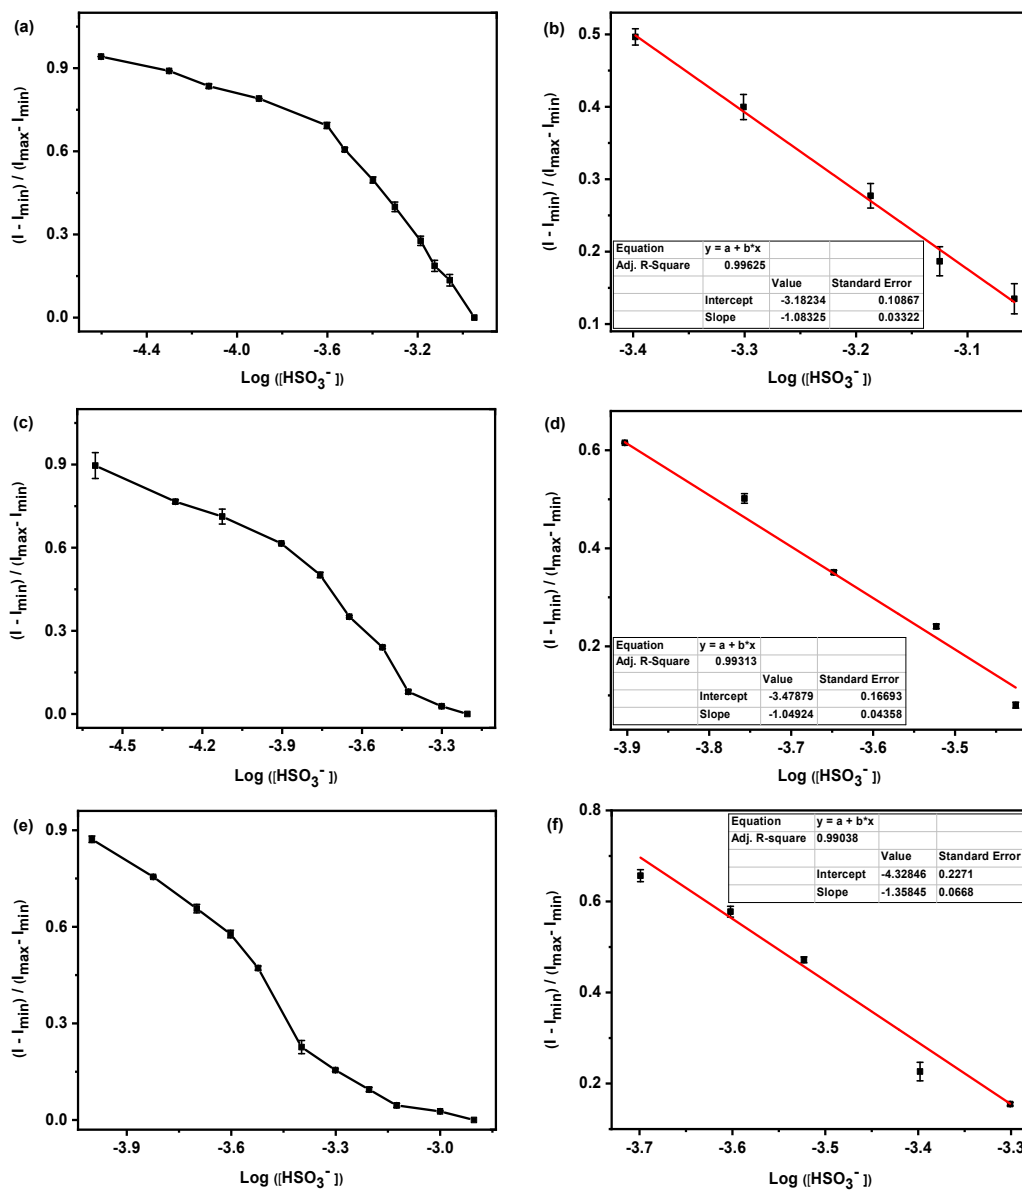

**Figure S20.** Plots of  $(I - I_{\min})/(I_{\max} - I_{\min})$  versus  $\log [\text{HSO}_3^-]$  and linear fitting for (a,b) **DPDT-o-CHO**, (c,d) **DPDT-m-CHO** and (e,f) **DPDT-p-CHO**.

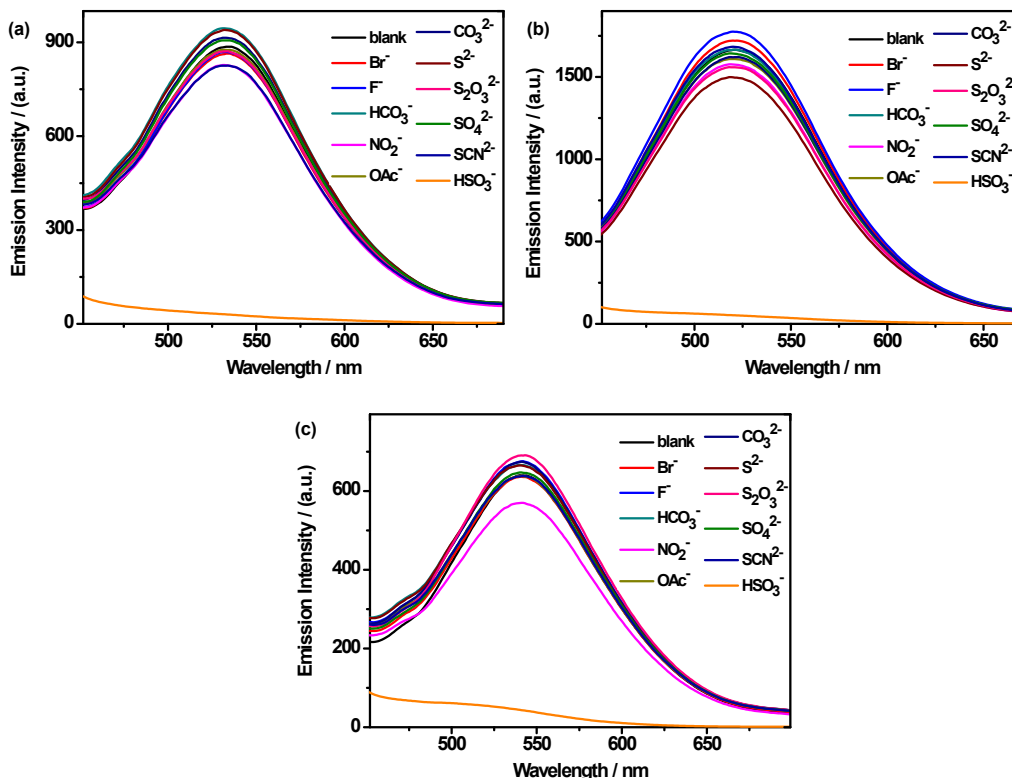

**Figure S21.** Fluorescence spectra of (a) **DPDT-o-CHO**, (b) **DPDT-m-CHO**, (c) **DPDT-p-CHO** responding to various anions (100 equiv.)

**Table S1.** List of sing-crystal X-ray diffraction data for **DPDT-o-CHO**, **DPDT-m-CHO** and **DPDT-p-CHO** (CCDC 1911367, 1911368 and 1911369).

| Compound       | <b>DPDT-o-CHO</b>                                             | <b>DPDT-m-CHO</b>                                             | <b>DPDT-p-CHO</b>                                             |
|----------------|---------------------------------------------------------------|---------------------------------------------------------------|---------------------------------------------------------------|
| Temperature    | 296 K                                                         | 296 K                                                         | 296 K                                                         |
| Bond precision | C-C = 0.0060 Å                                                | C-C = 0.0090 Å                                                | C-C = 0.0040 Å                                                |
|                | Wavelength = 0.71073 Å                                        | Wavelength = 0.0090 Å                                         | Wavelength = 0.71073 Å                                        |
| Cell           |                                                               |                                                               |                                                               |
| a (Å)          | 6.4405(5)                                                     | 9.5360(14)                                                    | 9.5258(6)                                                     |
| b (Å)          | 10.8836(8)                                                    | 9.7981(15)                                                    | 21.9137(13)                                                   |
| c (Å)          | 14.5616(11)                                                   | 13.849(3)                                                     | 9.9541(6)                                                     |
| $\alpha$ (°)   | 98.145(2)                                                     | 108.993(5)                                                    | 90                                                            |
| $\beta$ (°)    | 91.900(3)                                                     | 94.411(6)                                                     | 102.602(2)                                                    |
| $\gamma$ (°)   | 91.005(3)                                                     | 92.833(5)                                                     | 90                                                            |
| Volume         | 1009.60(13)                                                   | 1216.1(4)                                                     | 2027.8(2)                                                     |
| Crystal system | triclinic                                                     | triclinic                                                     | monoclinic                                                    |
| Space group    | P -1                                                          | P -1                                                          | P21/n                                                         |
| Hall group     | -P 1                                                          | -P 1                                                          | -P 2yn                                                        |
| Formula        | C <sub>24</sub> H <sub>16</sub> O <sub>2</sub> S <sub>2</sub> | C <sub>24</sub> H <sub>16</sub> O <sub>2</sub> S <sub>2</sub> | C <sub>24</sub> H <sub>16</sub> O <sub>2</sub> S <sub>2</sub> |
| Molecular      | 400.49                                                        | 400.49                                                        | 400.49                                                        |

---

|                           |              |              |              |
|---------------------------|--------------|--------------|--------------|
| Weight                    |              |              |              |
| Dx, g cm <sup>-3</sup>    | 1.317        | 1.291        | 1.312        |
| Z                         | 2            | 2            | 4            |
| $\mu$ (mm <sup>-1</sup> ) | 0.280        | 0.246        | 0.279        |
| F000                      | 416.0        | 496.0        | 832.0        |
| h, k, lmax                | 7, 12, 17    | 12, 13, 18   | 12, 29, 13   |
| Nref                      | 3545         | 5962         | 5046         |
| Data                      | 0.998        | 0.989        | 0.995        |
| completeness              |              |              |              |
| Theta(max)                | 24.996       | 28.275       | 28.360       |
| R(reflections)            | 0.0827(2719) | 0.0993(2088) | 0.0771(3654) |
| wR2(reflections)          | 0.2821(3545) | 0.3740(5962) | 0.2754(5046) |
| S                         | 1.080        | 1.004        | 1.046        |
| Npar                      | 254          | 275          | 264          |

---
